# Supplementary material
Source: MDPI journal article supplement (https://www.mdpi.com/2076-3417/13/1/582)
Supplement: s1 [file s1]

**Table S1.** One-way ANOVA results for the bacterial growth.

| Time, h | Source     | DoF | Adj.SS               | Adj.MS               | F-value        | p-value      | $\Pi\%$      |
|---------|------------|-----|----------------------|----------------------|----------------|--------------|--------------|
| 0       | pH control | 1   | $2.54 \cdot 10^{10}$ | $2.54 \cdot 10^{10}$ | 0.012          | 0.917        | 0.31         |
|         | Error      | 4   | $8.18 \cdot 10^{12}$ | $2.05 \cdot 10^{12}$ |                |              | 99.69        |
|         | Total      | 5   | $8.21 \cdot 10^{12}$ |                      |                |              |              |
| 2       | pH control | 1   | $6.60 \cdot 10^{11}$ | $6.60 \cdot 10^{11}$ | <b>14.434</b>  | <b>0.019</b> | <b>78.29</b> |
|         | Error      | 4   | $1.83 \cdot 10^{11}$ | $4.57 \cdot 10^{10}$ |                |              | 21.71        |
|         | Total      | 5   | $8.43 \cdot 10^{11}$ |                      |                |              |              |
| 4       | pH control | 1   | $1.32 \cdot 10^{11}$ | $1.32 \cdot 10^{11}$ | 0.132          | 0.735        | 3.19         |
|         | Error      | 4   | $4.01 \cdot 10^{12}$ | $1.00 \cdot 10^{12}$ |                |              | 96.81        |
|         | Total      | 5   | $4.14 \cdot 10^{12}$ |                      |                |              |              |
| 6       | pH control | 1   | $8.82 \cdot 10^{13}$ | $8.82 \cdot 10^{13}$ | 4.251          | 0.108        | 51.58        |
|         | Error      | 4   | $8.30 \cdot 10^{13}$ | $2.07 \cdot 10^{13}$ |                |              | 48.42        |
|         | Total      | 5   | $1.71 \cdot 10^{14}$ |                      |                |              |              |
| 8       | pH control | 1   | $1.39 \cdot 10^{15}$ | $1.39 \cdot 10^{15}$ | <b>131.630</b> | <b>0.000</b> | <b>97.20</b> |
|         | Error      | 4   | $4.22 \cdot 10^{13}$ | $1.05 \cdot 10^{13}$ |                |              | 2.80         |
|         | Total      | 5   | $1.43 \cdot 10^{15}$ |                      |                |              |              |
| 14      | pH control | 1   | $9.05 \cdot 10^{15}$ | $9.05 \cdot 10^{15}$ | <b>33.741</b>  | <b>0.004</b> | <b>89.60</b> |
|         | Error      | 4   | $1.07 \cdot 10^{15}$ | $2.68 \cdot 10^{14}$ |                |              | 10.40        |
|         | Total      | 5   | $1.01 \cdot 10^{16}$ |                      |                |              |              |
| 16      | pH control | 1   | $1.13 \cdot 10^{14}$ | $1.13 \cdot 10^{14}$ | 0.042          | 0.848        | 1.03         |
|         | Error      | 4   | $1.08 \cdot 10^{16}$ | $2.71 \cdot 10^{15}$ |                |              | 98.97        |
|         | Total      | 5   | $1.10 \cdot 10^{16}$ |                      |                |              |              |
| 18      | pH control | 1   | $2.08 \cdot 10^{17}$ | $2.08 \cdot 10^{17}$ | <b>18.758</b>  | <b>0.012</b> | <b>82.54</b> |
|         | Error      | 4   | $4.43 \cdot 10^{16}$ | $1.11 \cdot 10^{16}$ |                |              | 17.46        |
|         | Total      | 5   | $2.52 \cdot 10^{17}$ |                      |                |              |              |
| 20      | pH control | 1   | $4.32 \cdot 10^{15}$ | $4.32 \cdot 10^{15}$ | 3.388          | 0.139        | 51.31        |
|         | Error      | 4   | $5.10 \cdot 10^{15}$ | $1.28 \cdot 10^{15}$ |                |              | 48.69        |
|         | Total      | 5   | $9.42 \cdot 10^{15}$ |                      |                |              |              |
| 22      | pH control | 1   | $2.02 \cdot 10^{16}$ | $2.02 \cdot 10^{16}$ | <b>42.854</b>  | <b>0.003</b> | <b>91.40</b> |
|         | Error      | 4   | $1.88 \cdot 10^{15}$ | $4.71 \cdot 10^{14}$ |                |              | 8.60         |
|         | Total      | 5   | $2.21 \cdot 10^{16}$ |                      |                |              |              |
| 24      | pH control | 1   | $2.07 \cdot 10^{16}$ | $2.07 \cdot 10^{16}$ | 2.806          | 0.169        | 41.32        |
|         | Error      | 4   | $2.94 \cdot 10^{16}$ | $7.36 \cdot 10^{15}$ |                |              | 58.68        |
|         | Total      | 5   | $5.01 \cdot 10^{16}$ |                      |                |              |              |

**Table S2.** One-way ANOVA results for the lactic acid concentration.

| Time, h | Source     | DoF | Adj.SS | Adj.MS | F-value        | p-value      | $\Pi\%$      |
|---------|------------|-----|--------|--------|----------------|--------------|--------------|
| 14      | pH control | 1   | 0.635  | 0.635  | <b>31.199</b>  | <b>0.005</b> | <b>88.56</b> |
|         | Error      | 4   | 0.081  | 0.020  |                |              | 11.44        |
|         | Total      | 5   | 0.717  |        |                |              |              |
| 16      | pH control | 1   | 4.240  | 4.240  | <b>94.330</b>  | <b>0.001</b> | <b>95.93</b> |
|         | Error      | 4   | 0.180  | 0.045  |                |              | 4.07         |
|         | Total      | 5   | 4.420  |        |                |              |              |
| 18      | pH control | 1   | 3.671  | 3.671  | <b>33.142</b>  | <b>0.005</b> | <b>89.23</b> |
|         | Error      | 4   | 0.443  | 0.111  |                |              | 10.77        |
|         | Total      | 5   | 4.114  |        |                |              |              |
| 20      | pH control | 1   | 6.970  | 6.970  | <b>178.937</b> | <b>0.000</b> | <b>97.81</b> |
|         | Error      | 4   | 0.156  | 0.039  |                |              | 2.19         |
|         | Total      | 5   | 7.126  |        |                |              |              |
| 22      | pH control | 1   | 9.120  | 9.120  | <b>144.268</b> | <b>0.000</b> | <b>97.31</b> |

|    |            |       |   |        |        |         |       |
|----|------------|-------|---|--------|--------|---------|-------|
|    |            | Error | 4 | 0.253  | 0.063  |         | 2.69  |
|    |            | Total | 5 | 9.372  |        |         |       |
| 24 | pH control |       | 1 | 17.473 | 17.473 | 671.710 | 0.000 |
|    |            | Error | 4 | 0.104  | 0.026  |         | 0.59  |
|    |            | Total | 5 | 17.577 |        |         |       |
